# Supplementary material for: Mortality, Stroke, and Hospitalization Associated With Deferred vs Expedited Aortic Valve Replacement in Patients Referred for Symptomatic Severe Aortic Stenosis During the COVID-19 Pandemic
Source: PubMed Central journal article supplement (PMC7527876; doi:10.1001/jamanetworkopen.2020.20402), 2020-09-30

## Supplementary Online Content

Ryffel C, Lanz J, Corpataux N, et al. Mortality, stroke, and hospitalization associated with deferred vs expedited aortic valve replacement in patients referred for symptomatic severe aortic stenosis during the COVID-19 pandemic. *JAMA Netw Open*. 2020;3(9):e2020402. doi:10.1001/jamanetworkopen.2020.20402

### **eAppendix.**

This supplementary material has been provided by the authors to give readers additional information about their work.

## **eAppendix**

### *Eligibility criteria and treatment algorithm*

All patients with symptomatic severe aortic stenosis defined by an aortic valve area (AVA)  $\leq 1.0 \text{ cm}^2$  or an AVA indexed to body surface area  $< 0.6 \text{ cm}^2/\text{m}^2$ , including low-flow severe aortic stenosis defined by an indexed stroke volume  $\leq 35 \text{ ml}/\text{m}^2$ , that were referred for AVR between March 20 and April 26, 2020 were consecutively included. Patients with a life expectancy  $< 1$  year irrespective of valvular heart disease or severe dementia were excluded. The treatment algorithm according to pre-specified criteria is illustrated in [Suppl. Figure 1](#).

### *Data collection*

Baseline and follow-up data were recorded from documentation of referring physicians and standardized telephone interviews. Sweep follow-up by use of telephone interviews was performed between April 23 and April 30, 2020.

### *Definitions*

Deferred treatment was defined as postponement of AVR by three months after referral. Expedited treatment was defined as AVR within 2 week from referral. The primary endpoint was a composite of all-cause mortality, disabling and non-disabling stroke and unplanned hospitalization for valve-related symptoms or worsening heart failure by intention-to-treat as assessed at the end of the Swiss Federal Council's ban of elective procedures and the resumption of routine clinical work. Multivalvular disease was defined by the combination of aortic stenosis with moderate or severe stenosis or regurgitation of at least one additional valve.

### *Statistical Analysis*

Baseline characteristics and clinical findings are presented as numbers and frequencies (%) for categorical variables and as means ( $\pm$  standard deviation) for continuous variables. Categorical variables were compared by means of the Fisher's exact or Chi-square tests, continuous ones by two-

sample Student's t-tests. Time-to-event analyses were conducted using Kaplan-Meier estimates and compared with the log-rank test. All statistical analyses were performed with SAS software (version 9.4).

## **SUPPLEMENTARY FIGURE LEGENDS**

**Suppl. Figure 1      Treatment algorithm**

AVR=aortic valve replacement; AVA=aortic valve area

**Suppl. Figure 2      Flowchart according to STROBE statement**

The flowchart illustrates treatment allocation and outcome assessment.

**SUPPLEMENTARY FIGURES**

**Figure 1**

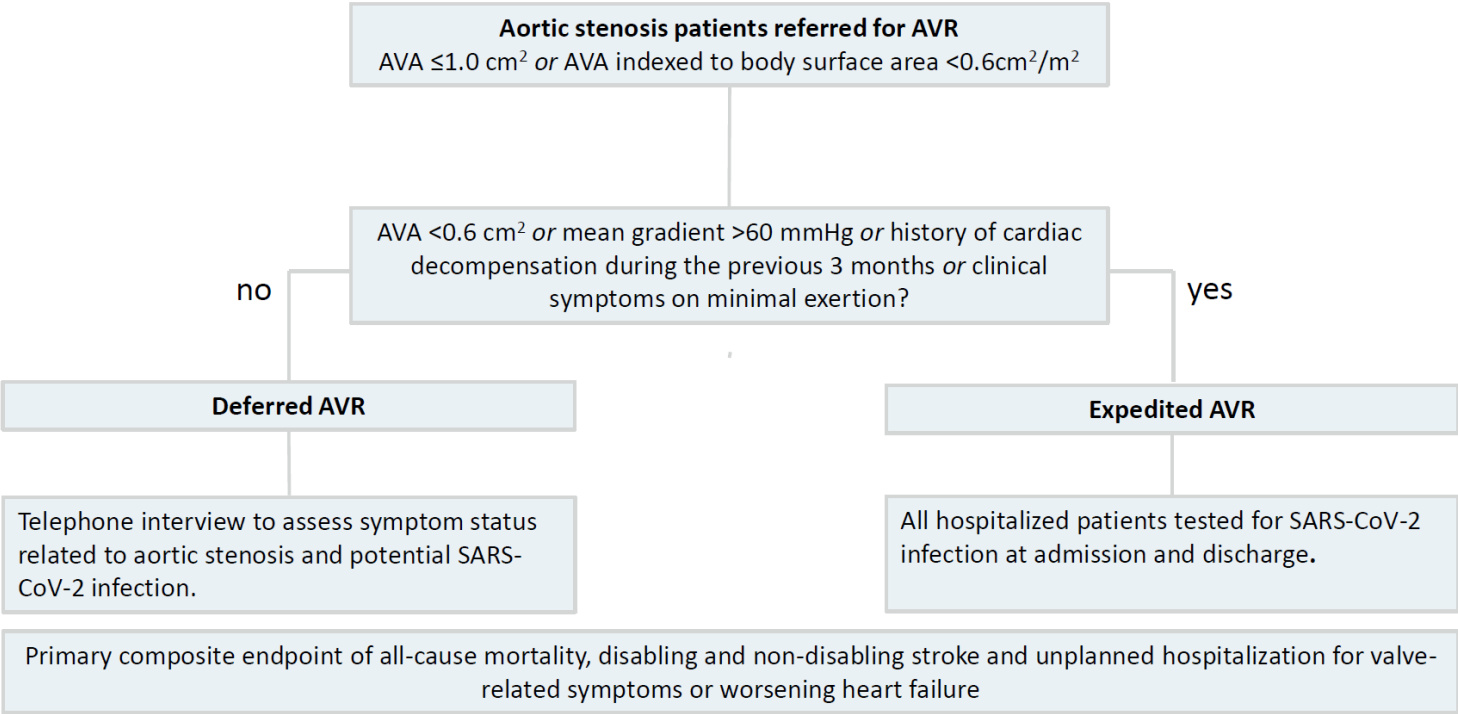

**Figure 2**

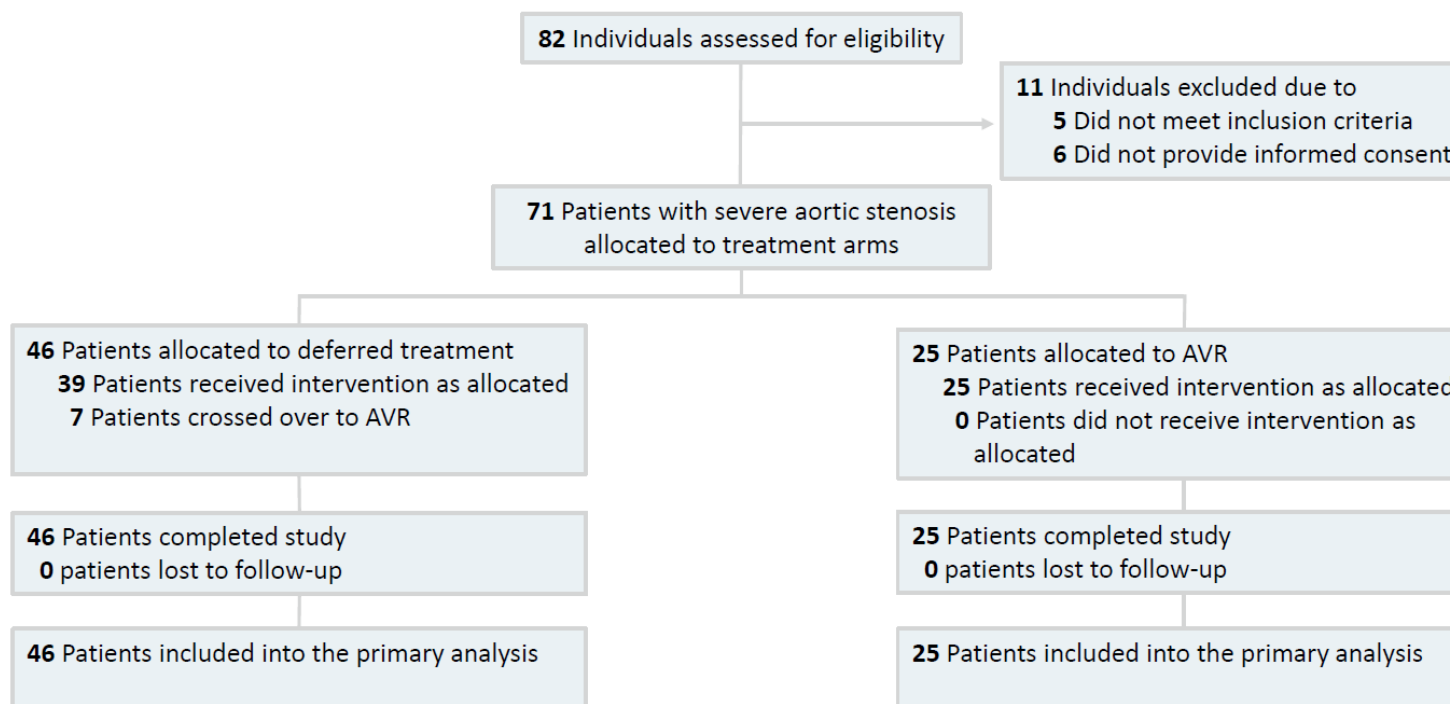

Supplement: jamanetwopen-e2020402-s001.pdf [file jamanetwopen-e2020402-s001.pdf]
